# Supplementary material for: PO43− doped Li4Ti5O12 hollow microspheres as an anode material for lithium-ion batteries
Source: Royal Society of Chemistry journal article supplement (doi:10.1039/c5ra17144j), 2015-01-01
Supplement: c5ra17144j1.pdf [file c5ra17144j1.pdf]

Electronic Supplementary Material (ESI) for RSC Advances

This journal is © The Royal Society of Chemistry 2015

## Electronic Supplementary Material

### $\text{PO}_4^{3-}$ doped $\text{Li}_4\text{Ti}_5\text{O}_{12}$ hollow microspheres as anode material for lithium-ion batteries

Dian-Dian Han, Gui-Ling Pan, Sheng Liu, and Xue-Ping Gao

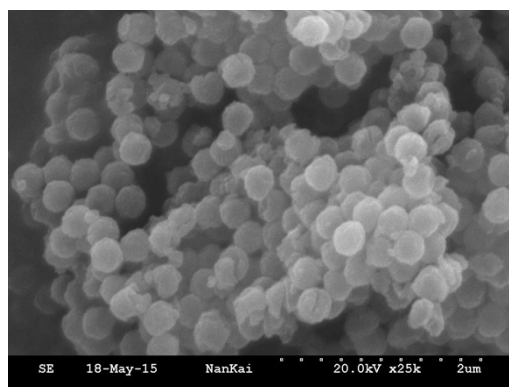

Fig. S1 SEM image of the spherical precursor.

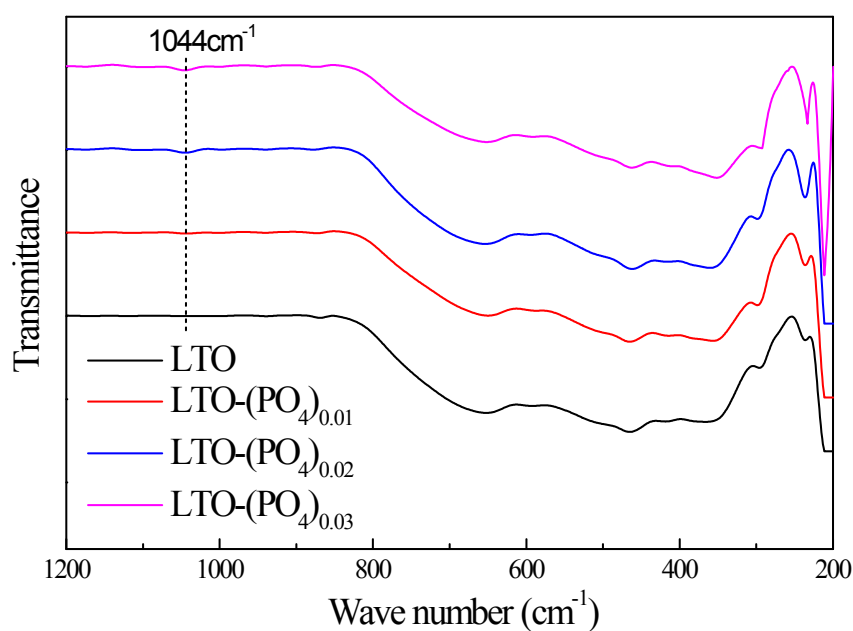

Fig. S2 FTIR of all the as-prepared samples

**Table S1** The lattice parameters of samples

| Sample                                 | a (Å)  |
|----------------------------------------|--------|
| LTO                                    | 8.3689 |
| LTO-(PO <sub>4</sub> ) <sub>0.01</sub> | 8.3726 |
| LTO-(PO <sub>4</sub> ) <sub>0.02</sub> | 8.3729 |
| LTO-(PO <sub>4</sub> ) <sub>0.03</sub> | 8.3733 |

**Table S2** The electronic conductivity of LTO-(PO<sub>4</sub>)<sub>x</sub>

| Sample                                 | Electronic conductivity |
|----------------------------------------|-------------------------|
| LTO                                    | 1.22 E -9               |
| LTO-(PO <sub>4</sub> ) <sub>0.01</sub> | 1.07 E -8               |
| LTO-(PO <sub>4</sub> ) <sub>0.02</sub> | 2.82 E -7               |
| LTO-(PO <sub>4</sub> ) <sub>0.03</sub> | 2.55 E -9               |
